# Supplementary material
Source: publisher figshare collection journal article supplement (https://sage.figshare.com/ndownloader/files/15290015)
Supplement: Supplementary file 1 [file 15290015]

*Supplemental material for article, The Interpersonal Transaction Scales-8 (ITS-8): A Circumplex-based, Behaviorally Anchored Instrument based on the CLOIT-R*

### **Interpersonal Transaction Scales-8 (ITS-8)**

#### **Self-Report Version (Items listed per octant)**

**DIRECTIONS.** The following pages contain lists of actions that can occur in interactions between two persons. Your task is to indicate the degree to which each item accurately describes an action typically exhibited by you in your transactions with other people.

To help you make these judgments, imagine that, for some time, a hidden "observer" has followed you around daily as you interacted with other persons in your life. Make your judgments based on what this hidden observer would have typically seen.

For each item, please choose the most accurate among the five possible answers: 1 (Not at all accurate); 2 (Slightly accurate); 3 (Moderately accurate); 4 (Very accurate); 5 (Extremely accurate).

| 1                      | 2                    | 3                      | 4                | 5                     |
|------------------------|----------------------|------------------------|------------------|-----------------------|
| Not at all<br>accurate | Slightly<br>accurate | Moderately<br>accurate | Very<br>accurate | Extremely<br>accurate |

#### **WHEN WITH OTHERS . . .**

##### *PA Items:*

- 1. I quickly take charge of the conversation or discussion
- 9. I comment on my own accomplishments or successes
- 17. I dominate the flow of conversation
- 25. I draw attention to my achievements or good-fortune
- 33. I express firm, strong personal preferences
- 41. I make comments or replies that "pop out" quickly and energetically

##### *DE Items:*

- 2. I show little interest in their personal feelings or opinions
- 10. I avoid giving them credit for contributions
- 18. I have little sympathy regarding their mistakes or weaknesses
- 26. I ignore or am inconsiderate of their feelings
- 34. I avoid showing affection or warmth
- 42. I complain about them, our situation, or our task

*HI Items:*

- 3. I express low self-worth or apologize frequently
- 11. I do not take the lead
- 19. I am hesitant or embarrassed to express my opinions
- 27. I claim I don't have an opinion or preference
- 35. I wait for or follow their lead regarding topics to discuss
- 43. I seem unable to stand up to them

*LM Items:*

- 4. I express understanding or forgiveness for their actions
- 12. I am considerate or solicitous of their feelings
- 20. I make flattering or glowing comments about them or our task
- 28. I make unconditionally supportive or encouraging comments to them
- 36. I am quick to express approval or acceptance of them
- 44. I am careful to acknowledge and be responsive to their statements and actions

*BC Items:*

- 5. I am cocky about my positions or decisions
- 13. I "tell them off" or "let them have it" when I disagree
- 21. I tend to overpower them by my arguments or actions
- 29. I act as if I am special or favored
- 37. I express stringent, rigorous standards or expectations of them
- 45. I challenge or dispute their ideas or statements

*FG Items:*

- 6. I refrain from maintaining eye contact or direct body orientation with them
- 14. I remain aloof or distant from them
- 22. I look uncomfortable with them as if I want to be by myself
- 30. I am slow to respond or speak to them
- 38. I speak undemonstratively, with little variation in tone or manner
- 46. I avoid or delay clear answers or commitment to positions

*JK Items:*

- 7. I show a desire to do whatever they want
- 15. I depend on their help or counsel
- 23. I yield easily to their viewpoints
- 31. I am quick to agree with their opinions or directions
- 39. I make statements softly or carefully to avoid implication of disapproval or criticism
- 47. I express lenient, soft-hearted standards or expectations of them

*NO Items:*

- 8. I express appreciation or delight about them, our situation, or our task
- 16. I am resourceful in making decisions or solving problems
- 24. I express my opinions with conviction and ease
- 32. I readily share my positive feelings with them
- 40. I speak or act dramatically, with much variation in tone or manner
- 48. I tend to move or lean toward them to be physically close
